# Supplementary material for: A theoretical study of ascorbic acid oxidation andHOO˙/O2˙−radical scavenging
Source: Royal Society of Chemistry journal article supplement (doi:10.1039/c7ob00791d), 2017-01-01
Supplement: c7ob00791d2.xlsx [file c7ob00791d2.xlsx]

## Sheet: pKa_red
	A theoretical study of oxidation of ascorbic acid and its antioxidant mechanism
	Yi-Jung Tu,1 David Njus,2 and H. Bernhard Schlegel *,1
	1 Department of Chemistry, Wayne State University, Detroit, MI, 48202
	2 Department of Biological Science, Wayne State University, Detroit, MI, 48202
	Conversions	Hartree to kcal/mol	R	T	ln(10)*RT	Gaq(H+)	F
		627.51	0.00198588	298.15	1.36334	-270.297	23.0604
		SMD/B3LYP/6-31+G(d,p)								specific pKa			ensemble
	conformers	SCF (hartree)	ZPE + ΔG(0→298K)	G (hartree)	G (kcal/mol)	rel. G (kcal/mol)	distribution	population (%)		pKa1r	pKa2r		pKa1r	pKa2r
H2A	H2A_1	-684.854	0.111507	-684.742	-429682	1.39098	0.0954377	0.028309		4.83042	14.5698		3.77622	14.6858
	H2A_2	-684.851	0.111611	-684.739	-429680	3.25936	0.00406699	0.00120636		6.06492	15.6608		3.77622	14.6858
	H2A_3	-684.855	0.112255	-684.742	-429682	1.20779	0.130044	0.0385741		3.95007	13.9976		3.77622	14.6858
	H2A_4	-684.853	0.110945	-684.742	-429682	1.38885	0.0957826	0.0284114		3.48542	13.3823		3.77622	14.6858
	H2A_5	-684.853	0.109351	-684.743	-429683	0.555335	0.39144	0.11611		3.86461	14.0017		3.77622	14.6858
	H2A_6	-684.856	0.111875	-684.744	-429683	0	1	0.296623		2.90059	12.5817		3.77622	14.6858
	H2A_7	-684.855	0.112027	-684.743	-429683	0.579816	0.375585	0.111407		3.00225	12.6322		3.77622	14.6858
	H2A_8	-684.855	0.11173	-684.743	-429683	0.547715	0.39651	0.117614		2.66899	12.6092		3.77622	14.6858
	H2A_9	-684.855	0.112448	-684.742	-429682	1.29884	0.111508	0.0330758		4.06422	14.0084		3.77622	14.6858
	H2A_10	-684.854	0.112827	-684.741	-429682	1.73843	0.0530724	0.0157425		3.67201	14.0165		3.77622	14.6858
	H2A_11	-684.856	0.112441	-684.744	-429683	0.196287	0.717834	0.212926		3.20189			3.77622
										3.45998	13.3353		3.77622	14.6858
HA-	HA-_1	-684.399	0.098731	-684.301	-429405	2.94676	0.00689556	0.00249873		4.69447	14.4263		3.77622	14.6858
	HA-_2	-684.396	0.09743	-684.298	-429404	4.62979	0.000401862	0.000145622		2.57962	12.7632		3.77622	14.6858
	HA-_3	-684.4	0.097069	-684.303	-429406	1.74654	0.0523506	0.0189702		2.11497	12.1478		3.77622	14.6858
	HA-_4	-684.402	0.09807	-684.304	-429407	1.11306	0.152607	0.0553		2.49417	12.7672		3.77622	14.6858
	HA-_5	-684.4	0.096863	-684.303	-429407	1.63003	0.063735	0.0230955		1.53015	11.3472		3.77622	14.6858
	HA-_6	-684.404	0.099086	-684.305	-429408	0.315751	0.586676	0.212593		1.6318	11.3977		3.77622	14.6858
	HA-_7	-684.404	0.0989	-684.305	-429408	0.454341	0.464241	0.168226		1.29855	11.3747		3.77622	14.6858
	HA-_8	-684.404	0.09858	-684.305	-429408	0	1	0.362368		2.69377	12.7739		3.77622	14.6858
	HA-_9	-684.4	0.097308	-684.302	-429406	1.90216	0.0402511	0.0145857		2.30156	12.782		3.77622	14.6858
	HA-_10	-684.4	0.096934	-684.303	-429407	1.36745	0.0993079	0.035986		1.83144			3.77622
	HA-_11	-684.404	0.099369	-684.304	-429407	0.726515	0.29316	0.106232		4.96479	15.4501		3.77622	14.6858
										6.19929	16.5411		3.77622	14.6858
A2-	A2-_1	-683.928	0.08669	-683.841	-429115	2.71042	0.0102783	0.00326446		4.08444	14.878		3.77622	14.6858
(Alpha=0.9)	A2-_2	-683.925	0.086302	-683.839	-429114	4.19787	0.000833461	0.000264713		3.61979	14.2627		3.77622	14.6858
	A2-_3	-683.929	0.086013	-683.843	-429116	1.93045	0.0383732	0.0121876		3.99898	14.882		3.77622	14.6858
	A2-_4	-683.929	0.085543	-683.844	-429117	1.09156	0.158252	0.0502619		3.03496	13.462		3.77622	14.6858
	A2-_5	-683.929	0.086089	-683.843	-429116	1.93597	0.0380171	0.0120745		3.13662	13.5126		3.77622	14.6858
	A2-_6	-683.932	0.086745	-683.846	-429118	0	1	0.317607		2.80336	13.4896		3.77622	14.6858
	A2-_7	-683.932	0.086852	-683.846	-429118	0.0689363	0.890093	0.2827		4.19859	14.8887		3.77622	14.6858
	A2-_8	-683.932	0.086802	-683.846	-429118	0.0375709	0.938517	0.29808		3.80638	14.8969		3.77622	14.6858
	A2-_9	-683.929	0.08609	-683.843	-429116	1.94507	0.0374373	0.0118904		3.33626			3.77622
	A2-_10	-683.929	0.086122	-683.843	-429116	1.95619	0.0367407	0.0116691		4.83199	15.9148		3.77622	14.6858
										6.06648	17.0058		3.77622	14.6858
										3.95164	15.3426		3.77622	14.6858
										3.48698	14.7273		3.77622	14.6858
		SMD/CBS-QB3								3.86618	15.3467		3.77622	14.6858
		G (hartree)	G (kcal/mol)		pKa1r	pKa2r				2.90216	13.9267		3.77622	14.6858
	H2A	-683.93	-429172		4.1615	13.7928				3.00382	13.9772		3.77622	14.6858
	HA-	-683.49	-428896							2.67056	13.9542		3.77622	14.6858
	A2- (a=0.9)	-683.029	-428607							4.06578	15.3534		3.77622	14.6858
		SMD with inclusion of explicit waters								3.67358	15.3615		3.77622	14.6858
	H2A(H2O)2	-836.649	-525005		4.45193	14.1624				3.20345			3.77622
	HA-(H2O)2	-836.208	-524729			10.505	(cavity scaled by 0.9)			5.44337	15.5356		3.77622	14.6858
	A2-(H2O)2	-835.747	-524439							6.67786	16.6266		3.77622	14.6858
	A2-(H2O)2 (a=0.9)	-835.755	-524444							4.56302	14.9635		3.77622	14.6858
										4.09836	14.3481		3.77622	14.6858
										4.47756	14.9675		3.77622	14.6858
										3.51354	13.5475		3.77622	14.6858
										3.61519	13.598		3.77622	14.6858
										3.28194	13.575		3.77622	14.6858
										4.67716	14.9742		3.77622	14.6858
										4.28495	14.9823		3.77622	14.6858
										3.81483			3.77622
										5.8507	16.4996		3.77622	14.6858
										7.0852	17.5906		3.77622	14.6858
										4.97035	15.9275		3.77622	14.6858
										4.5057	15.3122		3.77622	14.6858
										4.88489	15.9315		3.77622	14.6858
										3.92087	14.5115		3.77622	14.6858
										4.02253	14.5621		3.77622	14.6858
										3.68927	14.5391		3.77622	14.6858
										5.08449	15.9382		3.77622	14.6858
										4.69229	15.9464		3.77622	14.6858
										4.22217			3.77622
										5.42541	16.3979		3.77622	14.6858
										6.6599	17.489		3.77622	14.6858
										4.54506	15.8258		3.77622	14.6858
										4.0804	15.2105		3.77622	14.6858
										4.4596	15.8299		3.77622	14.6858
										3.49558	14.4098		3.77622	14.6858
										3.59724	14.4604		3.77622	14.6858
										3.26398	14.4374		3.77622	14.6858
										4.6592	15.8365		3.77622	14.6858
										4.267	15.8447		3.77622	14.6858
										3.79688			3.77622
										5.44896	16.7312		3.77622	14.6858
										6.68345	17.8222		3.77622	14.6858
										4.56861	16.1591		3.77622	14.6858
										4.10395	15.5438		3.77622	14.6858
										4.48315	16.1631		3.77622	14.6858
										3.51913	14.7431		3.77622	14.6858
										3.62078	14.7937		3.77622	14.6858
										3.28753	14.7707		3.77622	14.6858
										4.68275	16.1698		3.77622	14.6858
										4.29054	16.178		3.77622	14.6858
										3.82042			3.77622
										4.89801	15.336		3.77622	14.6858
										6.1325	16.427		3.77622	14.6858
										4.01766	14.7639		3.77622	14.6858
										3.553	14.1485		3.77622	14.6858
										3.9322	14.7679		3.77622	14.6858
										2.96818	13.3479		3.77622	14.6858
										3.06983	13.3984		3.77622	14.6858
										2.73658	13.3754		3.77622	14.6858
										4.1318	14.7746		3.77622	14.6858
										3.73959	14.7827		3.77622	14.6858
										3.26947			3.77622
										4.57557	15.7282		3.77622	14.6858
										5.81006	16.8192		3.77622	14.6858
										3.69522	15.1561		3.77622	14.6858
										3.23056	14.5407		3.77622	14.6858
										3.60976	15.1601		3.77622	14.6858
										2.64574	13.7401		3.77622	14.6858
										2.7474	13.7907		3.77622	14.6858
										2.41414	13.7676		3.77622	14.6858
										3.80936	15.1668		3.77622	14.6858
										3.41716	15.1749		3.77622	14.6858
										2.94704			3.77622
										5.70673	16.1983		3.77622	14.6858
										6.94122	17.2893		3.77622	14.6858
										4.82638	15.6262		3.77622	14.6858
										4.36172	15.0109		3.77622	14.6858
										4.74092	15.6302		3.77622	14.6858
										3.7769	14.2102		3.77622	14.6858
										3.87855	14.2608		3.77622	14.6858
										3.5453	14.2378		3.77622	14.6858
										4.94052	15.6369		3.77622	14.6858
										4.54831	15.6451		3.77622	14.6858
										4.07819			3.77622

## Sheet: pKa_ox1
	A theoretical study of oxidation of ascorbic acid and its antioxidant mechanism
	Yi-Jung Tu,1 David Njus,2 and H. Bernhard Schlegel *,1
	1 Department of Chemistry, Wayne State University, Detroit, MI, 48202
	2 Department of Biological Science, Wayne State University, Detroit, MI, 48202
	Conversions	Hartree to kcal/mol	R	T	ln(10)*RT	Gaq(H+)	F
		627.51	0.00198588	298.15	1.36334	-270.297	23.0604
		SMD/B3LYP/6-31+G(d,p)								specific		ensemble
	conformers	SCF (hartree)	ZPE + ΔG(0→298K)	G (hartree)	G (kcal/mol)	rel. G (kcal/mol)	distribution	population (%)		pKa2o		pKa2o
HA.	HA._1	-684.22	0.09913	-684.121	-429292	2.63427	0.011689	0.00343074		-1.13696		-1.43098
	HA._2	-684.217	0.098888	-684.118	-429291	4.53981	0.000467812	0.000137304		-0.722253		-1.43098
	HA._3	-684.221	0.097548	-684.124	-429294	0.828273	0.246869	0.0724566		-3.11917		-1.43098
	HA._4	-684.223	0.098189	-684.125	-429295	0	1	0.293502		-2.36027		-1.43098
	HA._5	-684.221	0.097253	-684.124	-429294	0.63215	0.343812	0.10091		-2.91107		-1.43098
	HA._6	-684.221	0.098252	-684.123	-429294	1.39745	0.094402	0.0277072		-2.83117		-1.43098
	HA._7	-684.221	0.098674	-684.122	-429293	1.85205	0.0438058	0.0128571		-2.9004		-1.43098
	HA._8	-684.221	0.098536	-684.123	-429294	1.56758	0.0708249	0.0207873		-2.95207		-1.43098
	HA._9	-684.221	0.096837	-684.125	-429295	0.354604	0.549414	0.161254		-3.24934		-1.43098
	HA._10	-684.222	0.096639	-684.125	-429295	0.00617909	0.989618	0.290455	-1.32164	-3.12719		-1.43098
	HA._11	-684.221	0.098483	-684.123	-429293	1.70429	0.0562232	0.0165017		-2.53466		-1.43098
										-2.11996		-1.43098
A-.	A-._1	-683.782	aa1h	0.086738	-429024	2.87988	0.00772011	0.00174328		-4.51687		-1.43098
	A-._2	-683.781	aa1l	0.085846	-429023	3.44526	0.0029711	0.000670903		-3.75797		-1.43098
	A-._3	-683.785	aa2l	0.085069	-429026	0.177463	0.741023	0.16733		-4.30877		-1.43098
	A-._4	-683.785	aa3l	0.086446	-429025	1.2121	0.129102	0.0291525		-4.22887		-1.43098
	A-._5	-683.785	aa5l	0.085521	-429026	0.461171	0.458917	0.103628		-4.29811		-1.43098
	A-._6	-683.787	aa7l	0.087073	-429026	0.570101	0.381798	0.0862138		-4.34977		-1.43098
	A-._7	-683.787	aa8l	0.086933	-429026	0.475712	0.447783	0.101114		-4.64704		-1.43098
	A-._8	-683.787	aa9l	0.086814	-429026	0.405273	0.504353	0.113888		-4.5249		-1.43098
	A-._9	-683.785	aa5l_com1	0.084776	-429027	0	1	0.22581		0.187731		-1.43098
	A-._10	-683.785	aa5l_com2	0.085039	-429026	0.166525	0.75484	0.17045		0.602437		-1.43098
										-1.79448		-1.43098
										-1.03558		-1.43098
		CBS-QB3								-1.58638		-1.43098
		G (hartree)	G (kcal/mol)		pKa2o					-1.50648		-1.43098
	HA.	-683.305	-428780		-2.33943					-1.57571		-1.43098
	A-.	-682.879	-428513							-1.62738		-1.43098
		SMD with inclusion of explicit waters								-1.92465		-1.43098
	HA.(H2O)2	-836.025	-524613		-1.20853					-1.8025		-1.43098
	A-.(H2O)2	-835.596	-524345							0.795265		-1.43098
										1.20997		-1.43098
										-1.18694		-1.43098
										-0.428045		-1.43098
										-0.978846		-1.43098
										-0.898946		-1.43098
										-0.968179		-1.43098
										-1.01985		-1.43098
										-1.31711		-1.43098
										-1.19497		-1.43098
										0.331586		-1.43098
										0.746292		-1.43098
										-1.65062		-1.43098
										-0.891724		-1.43098
										-1.44252		-1.43098
										-1.36262		-1.43098
										-1.43186		-1.43098
										-1.48352		-1.43098
										-1.78079		-1.43098
										-1.65865		-1.43098
										-0.229754		-1.43098
										0.184952		-1.43098
										-2.21196		-1.43098
										-1.45306		-1.43098
										-2.00386		-1.43098
										-1.92397		-1.43098
										-1.9932		-1.43098
										-2.04487		-1.43098
										-2.34213		-1.43098
										-2.21999		-1.43098
										-0.563204		-1.43098
										-0.148498		-1.43098
										-2.54541		-1.43098
										-1.78651		-1.43098
										-2.33731		-1.43098
										-2.25742		-1.43098
										-2.32665		-1.43098
										-2.37831		-1.43098
										-2.67558		-1.43098
										-2.55344		-1.43098
										-0.35455		-1.43098
										0.0601568		-1.43098
										-2.33676		-1.43098
										-1.57786		-1.43098
										-2.12866		-1.43098
										-2.04876		-1.43098
										-2.11799		-1.43098
										-2.16966		-1.43098
										-2.46693		-1.43098
										-2.34478		-1.43098
										0.535165		-1.43098
										0.949871		-1.43098
										-1.44704		-1.43098
										-0.688145		-1.43098
										-1.23895		-1.43098
										-1.15905		-1.43098
										-1.22828		-1.43098
										-1.27995		-1.43098
										-1.57721		-1.43098
										-1.45507		-1.43098
										0.790732		-1.43098
										1.20544		-1.43098
										-1.19148		-1.43098
										-0.432577		-1.43098
										-0.983378		-1.43098
										-0.903478		-1.43098
										-0.972712		-1.43098
										-1.02438		-1.43098
										-1.32164		-1.43098
										-1.1995		-1.43098
										-0.45482		-1.43098
										-0.0401131		-1.43098
										-2.43703		-1.43098
										-1.67813		-1.43098
										-2.22893		-1.43098
										-2.14903		-1.43098
										-2.21826		-1.43098
										-2.26993		-1.43098
										-2.5672		-1.43098
										-2.44505		-1.43098

## Sheet: E_ox1
	A theoretical study of oxidation of ascorbic acid and its antioxidant mechanism
	Yi-Jung Tu,1 David Njus,2 and H. Bernhard Schlegel *,1
	1 Department of Chemistry, Wayne State University, Detroit, MI, 48202
	2 Department of Biological Science, Wayne State University, Detroit, MI, 48202
	Conversions	Hartree to kcal/mol	R	T	ln(10)*RT	Gaq(H+)	F	SHE+Ggas(e-)	SHE	Ggas(e-)
		627.51	0.00198588	298.15	1.36334	-270.297	23.0604	4.3186	4.281	-0.867
		SMD/B3LYP/6-31+G(d,p)								specific Eox1 (V) vs. SHE				ensemble Eox1 (V) vs. SHE
	conformers	SCF (hartree)	ZPE + ΔG(0→298K)	G (hartree)	G (kcal/mol)	rel. G (kcal/mol)	distribution	population (%)		Eox1 (HA-, HA.)	Eox1 (HA-, A-./H+)	Eox1 (A2-, A-.)		Eox1 (HA-, HA.)	Eox1 (HA-, A-./H+)	Eox1 (A2-, A-.)
HA-	HA-_1	-684.399	0.098731	-684.301	-429405	2.94676	0.00689556	0.00249873		0.572216	0.42304	-0.356369		0.580355	0.413797	-0.372476
	HA-_2	-684.396	0.09743	-684.298	-429404	4.62979	0.000401862	0.000145622		0.654849	0.447558	-0.331852		0.580355	0.413797	-0.372476
	HA-_3	-684.4	0.097069	-684.303	-429406	1.74654	0.0523506	0.0189702		0.4939	0.305851	-0.473558		0.580355	0.413797	-0.372476
	HA-_4	-684.402	0.09807	-684.304	-429407	1.11306	0.152607	0.0553		0.457983	0.350718	-0.428692		0.580355	0.413797	-0.372476
	HA-_5	-684.4	0.096863	-684.303	-429407	1.63003	0.063735	0.0230955		0.485396	0.318154	-0.461255		0.580355	0.413797	-0.372476
	HA-_6	-684.404	0.099086	-684.305	-429408	0.315751	0.586676	0.212593		0.518582	0.322878	-0.456531		0.580355	0.413797	-0.372476
	HA-_7	-684.404	0.0989	-684.305	-429408	0.454341	0.464241	0.168226		0.538296	0.318785	-0.460624		0.580355	0.413797	-0.372476
	HA-_8	-684.404	0.09858	-684.305	-429408	0	1	0.362368	0.586035	0.52596	0.31573	-0.463679		0.580355	0.413797	-0.372476
	HA-_9	-684.4	0.097308	-684.302	-429406	1.90216	0.0402511	0.0145857		0.47336	0.298156	-0.481253		0.580355	0.413797	-0.372476
	HA-_10	-684.4	0.096934	-684.303	-429407	1.36745	0.0993079	0.035986		0.458251	0.305377	-0.474032		0.580355	0.413797	-0.372476
	HA-_11	-684.404	0.099369	-684.304	-429407	0.726515	0.29316	0.106232		0.531888				0.580355
										0.499233	0.350057	-0.420871		0.580355	0.413797	-0.372476
HA.	HA._1	-684.22	aa1h	0.09913	-429292	2.63427	0.011689	0.00343074		0.581866	0.374574	-0.396354		0.580355	0.413797	-0.372476
	HA._2	-684.217	aa1l	0.098888	-429291	4.53981	0.000467812	0.000137304		0.420917	0.232868	-0.53806		0.580355	0.413797	-0.372476
	HA._3	-684.221	aa2l	0.097548	-429294	0.828273	0.246869	0.0724566		0.384999	0.277734	-0.493194		0.580355	0.413797	-0.372476
	HA._4	-684.223	aa3l	0.098189	-429295	0	1	0.293502		0.412412	0.245171	-0.525757		0.580355	0.413797	-0.372476
	HA._5	-684.221	aa5l	0.097253	-429294	0.63215	0.343812	0.10091		0.445599	0.249894	-0.521034		0.580355	0.413797	-0.372476
	HA._6	-684.221	aa7l	0.098252	-429294	1.39745	0.094402	0.0277072		0.465312	0.245801	-0.525127		0.580355	0.413797	-0.372476
	HA._7	-684.221	aa8l	0.098674	-429293	1.85205	0.0438058	0.0128571		0.452976	0.242747	-0.528181		0.580355	0.413797	-0.372476
	HA._8	-684.221	aa9l	0.098536	-429294	1.56758	0.0708249	0.0207873		0.400376	0.225172	-0.545756		0.580355	0.413797	-0.372476
	HA._9	-684.221	aa5l_com1	0.096837	-429295	0.354604	0.549414	0.161254		0.385267	0.232394	-0.538535		0.580355	0.413797	-0.372476
	HA._10	-684.222	aa5l_com2	0.096639	-429295	0.00617909	0.989618	0.290455		0.458904				0.580355
	HA._11	-684.221	aa7l_com1	0.098483	-429293	1.70429	0.0562232	0.0165017		0.624263	0.475087	-0.322546		0.580355	0.413797	-0.372476
										0.706896	0.499604	-0.298028		0.580355	0.413797	-0.372476
A2-	A2-_1	-683.928		0.08669	-429117	2.71042	0.0102783	0.00326446		0.545947	0.357898	-0.439735		0.580355	0.413797	-0.372476
(Alpha=0.9)	A2-_2	-683.925		0.086302	-429115	4.19787	0.000833461	0.000264713		0.510029	0.402764	-0.394868		0.580355	0.413797	-0.372476
	A2-_3	-683.929		0.086013	-429118	1.93045	0.0383732	0.0121876		0.537442	0.370201	-0.427432		0.580355	0.413797	-0.372476
	A2-_4	-683.929		0.085543	-429119	1.09156	0.158252	0.0502619		0.570629	0.374925	-0.422708		0.580355	0.413797	-0.372476
	A2-_5	-683.929		0.086089	-429118	1.93597	0.0380171	0.0120745		0.590342	0.370832	-0.426801		0.580355	0.413797	-0.372476
	A2-_6	-683.932		0.086745	-429120	0	1	0.317607	-0.363718	0.578007	0.367777	-0.429856		0.580355	0.413797	-0.372476
	A2-_7	-683.932		0.086852	-429120	0.0689363	0.890093	0.2827		0.525407	0.350203	-0.44743		0.580355	0.413797	-0.372476
	A2-_8	-683.932		0.086802	-429120	0.0375709	0.938517	0.29808		0.510297	0.357424	-0.440209		0.580355	0.413797	-0.372476
	A2-_9	-683.929		0.08609	-429118	1.94507	0.0374373	0.0118904		0.583935				0.580355
	A2-_10	-683.929		0.086122	-429118	1.95619	0.0367407	0.0116691		0.651734	0.502557	-0.286168		0.580355	0.413797	-0.372476
										0.734366	0.527075	-0.26165		0.580355	0.413797	-0.372476
										0.573418	0.385369	-0.403357		0.580355	0.413797	-0.372476
A-.	A-._1	-683.782	aa1h	0.086738	-429026	2.70242	0.0104182	0.00174328		0.5375	0.430235	-0.35849		0.580355	0.413797	-0.372476
	A-._2	-683.781	aa1l	0.085846	-429025	3.2678	0.00400945	0.000670903		0.564913	0.397671	-0.391054		0.580355	0.413797	-0.372476
	A-._3	-683.785	aa2l	0.085069	-429028	0	1	0.16733		0.598099	0.402395	-0.38633		0.580355	0.413797	-0.372476
	A-._4	-683.785	aa3l	0.086446	-429027	1.03463	0.174221	0.0291525		0.617813	0.398302	-0.390423		0.580355	0.413797	-0.372476
	A-._5	-683.785	aa5l	0.085521	-429028	0.283708	0.619301	0.103628		0.605477	0.395247	-0.393478		0.580355	0.413797	-0.372476
	A-._6	-683.787	aa7l	0.087073	-429028	0.392638	0.515231	0.0862138		0.552877	0.377673	-0.411052		0.580355	0.413797	-0.372476
	A-._7	-683.787	aa8l	0.086933	-429028	0.29825	0.604276	0.101114		0.537768	0.384894	-0.403831		0.580355	0.413797	-0.372476
	A-._8	-683.787	aa9l	0.086814	-429028	0.22781	0.680616	0.113888		0.611405				0.580355
	A-._9	-683.785	aa5l_com1	0.084776	-429028	-0.177463	1.34948	0.22581		0.629315	0.480139	-0.322785		0.580355	0.413797	-0.372476
	A-._10	-683.785	aa5l_com2	0.085039	-429028	-0.0109381	1.01865	0.17045		0.711948	0.504657	-0.298268		0.580355	0.413797	-0.372476
										0.550999	0.36295	-0.439974		0.580355	0.413797	-0.372476
										0.515082	0.407817	-0.395108		0.580355	0.413797	-0.372476
										0.542494	0.375253	-0.427671		0.580355	0.413797	-0.372476
										0.575681	0.379977	-0.422948		0.580355	0.413797	-0.372476
		SMD/CBS-QB3								0.595395	0.375884	-0.427041		0.580355	0.413797	-0.372476
		G (hartree)	G (kcal/mol)			E0 (V)	E7 (V)			0.583059	0.372829	-0.430095		0.580355	0.413797	-0.372476
	HA-	-683.49	-428896	Eox1(HA-, HA.)		0.721453	0.325591			0.530459	0.355255	-0.44767		0.580355	0.413797	-0.372476
	HA.	-683.305	-428780	Eox1(HA-, H+/A.-)		0.583146				0.51535	0.362476	-0.440448		0.580355	0.413797	-0.372476
	A-.	-682.879	-428513	Eox1(A2-, A.-)		-0.232286				0.588987				0.580355
	A2- (a=0.9)	-683.029	-428607							0.686308	0.537132	-0.238833		0.580355	0.413797	-0.372476
	with inclusion of explicit water									0.768941	0.56165	-0.214316		0.580355	0.413797	-0.372476
	HA-(H2O)2	-836.208	-524729	Eox1(HA-, HA.)		0.684201	0.198903			0.607992	0.419944	-0.356022		0.580355	0.413797	-0.372476
	HA.(H2O)2	-836.025	-524613	Eox1(A2-, A-.)		-0.00830718				0.572075	0.46481	-0.311156		0.580355	0.413797	-0.372476
	A2-(H2O)2	-835.596	-524345	Eox1(HA-, H+/A.-)		0.612752	0.19899			0.599488	0.432246	-0.343719		0.580355	0.413797	-0.372476
	A2-(H2O)2 (a=0.9)	-835.755	-524444			-0.368				0.632674	0.43697	-0.338996		0.580355	0.413797	-0.372476
										0.652388	0.432877	-0.343089		0.580355	0.413797	-0.372476
										0.640052	0.429822	-0.346143		0.580355	0.413797	-0.372476
										0.587452	0.412248	-0.363718		0.580355	0.413797	-0.372476
										0.572343	0.419469	-0.356496		0.580355	0.413797	-0.372476
										0.64598				0.580355
										0.680299	0.531122	-0.241823		0.580355	0.413797	-0.372476
										0.762931	0.55564	-0.217305		0.580355	0.413797	-0.372476
										0.601983	0.413934	-0.359011		0.580355	0.413797	-0.372476
										0.566065	0.4588	-0.314145		0.580355	0.413797	-0.372476
										0.593478	0.426236	-0.346709		0.580355	0.413797	-0.372476
										0.626664	0.43096	-0.341985		0.580355	0.413797	-0.372476
										0.646378	0.426867	-0.346078		0.580355	0.413797	-0.372476
										0.634042	0.423813	-0.349133		0.580355	0.413797	-0.372476
										0.581442	0.406238	-0.366707		0.580355	0.413797	-0.372476
										0.566333	0.413459	-0.359486		0.580355	0.413797	-0.372476
										0.63997				0.580355
										0.700001	0.550825	-0.240463		0.580355	0.413797	-0.372476
										0.782634	0.575342	-0.215945		0.580355	0.413797	-0.372476
										0.621685	0.433636	-0.357651		0.580355	0.413797	-0.372476
										0.585767	0.478502	-0.312785		0.580355	0.413797	-0.372476
										0.61318	0.445939	-0.345348		0.580355	0.413797	-0.372476
										0.646367	0.450662	-0.340625		0.580355	0.413797	-0.372476
										0.66608	0.446569	-0.344718		0.580355	0.413797	-0.372476
										0.653745	0.443515	-0.347772		0.580355	0.413797	-0.372476
										0.601144	0.42594	-0.365347		0.580355	0.413797	-0.372476
										0.586035	0.433162	-0.358126		0.580355	0.413797	-0.372476
										0.659673				0.580355
										0.617515	0.468339	-0.32318		0.580355	0.413797	-0.372476
										0.700148	0.492856	-0.298662		0.580355	0.413797	-0.372476
										0.539199	0.35115	-0.440369		0.580355	0.413797	-0.372476
										0.503281	0.396016	-0.395502		0.580355	0.413797	-0.372476
										0.530694	0.363453	-0.428066		0.580355	0.413797	-0.372476
										0.563881	0.368176	-0.423342		0.580355	0.413797	-0.372476
										0.583594	0.364083	-0.427435		0.580355	0.413797	-0.372476
										0.571259	0.361029	-0.43049		0.580355	0.413797	-0.372476
										0.518658	0.343454	-0.448064		0.580355	0.413797	-0.372476
										0.503549	0.350676	-0.440843		0.580355	0.413797	-0.372476
										0.577187				0.580355
										0.640702	0.491526	-0.323662		0.580355	0.413797	-0.372958
										0.723335	0.516044	-0.299145		0.580355	0.413797	-0.372958
										0.562386	0.374337	-0.440851		0.580355	0.413797	-0.372958
										0.526469	0.419204	-0.395985		0.580355	0.413797	-0.372958
										0.553881	0.38664	-0.428548		0.580355	0.413797	-0.372958
										0.587068	0.391364	-0.423824		0.580355	0.413797	-0.372958
										0.606782	0.387271	-0.427918		0.580355	0.413797	-0.372958
										0.594446	0.384216	-0.430972		0.580355	0.413797	-0.372958
										0.541846	0.366642	-0.448547		0.580355	0.413797	-0.372958
										0.526736	0.373863	-0.441325		0.580355	0.413797	-0.372958
										0.600374				0.580355
										0.668496	0.51932			0.580355
										0.751129	0.543837			0.580355
										0.59018	0.402131			0.580355
										0.554262	0.446997			0.580355
										0.581675	0.414434			0.580355
										0.614862	0.419157			0.580355
										0.634575	0.415064			0.580355
										0.62224	0.41201			0.580355
										0.569639	0.394435			0.580355
										0.55453	0.401657			0.580355
										0.628168				0.580355

## Sheet: E_ox2
	A theoretical study of oxidation of ascorbic acid and its antioxidant mechanism
	Yi-Jung Tu,1 David Njus,2 and H. Bernhard Schlegel *,1
	1 Department of Chemistry, Wayne State University, Detroit, MI, 48202
	2 Department of Biological Science, Wayne State University, Detroit, MI, 48202
	Conversions	Hartree to kcal/mol	R	T	ln(10)*RT	Gaq(H+)	F	SHE+Ggas(e-)	SHE	Ggas(e-)
		627.51	0.00198588	298.15	1.36334	-270.297	23.0604	4.3186	4.281	-0.867
		SMD/B3LYP/6-31+G(d,p)									specific		ensemble
	conformers	SCF (hartree)	ZPE + ΔG(0→298K)	G (hartree)	G (kcal/mol)	rel. G (kcal/mol)	distribution	population (%)			Eox2 (A-., DHA1)		Eox2 (A-., DHA1)
DHA1	DHA1_1	-683.611	0.089162	-683.522	-428916	0.810912	0.254214	0.0935572			0.413939		0.5162
	DHA1_2	-683.604	0.087318	-683.516	-428913	4.16694	0.000878162	0.000323185			0.559471		0.5162
	DHA1_3	-683.609	0.086946	-683.522	-428916	0.989645	0.187975	0.0691795			0.42169		0.5162
	DHA1_4	-683.607	0.086533	-683.521	-428916	1.36166	0.100284	0.0369069			0.437822		0.5162
	DHA1_5	-683.609	0.086119	-683.522	-428917	0.412571	0.498174	0.18334			0.396665		0.5162
	DHA1_6	-683.607	0.087496	-683.519	-428915	2.5159	0.0142758	0.00525386			0.487875		0.5162
	DHA1_7	-683.607	0.086907	-683.52	-428915	2.16262	0.0259256	0.00954126			0.472555		0.5162
	DHA1_8	-683.607	0.086285	-683.52	-428915	1.79739	0.0480422	0.0176807			0.456717		0.5162
	DHA1_9	-683.609	0.085432	-683.523	-428917	0	1	0.368025			0.378775		0.5162
	DHA1_10	-683.609	0.085944	-683.523	-428917	0.314981	0.587439	0.216192			0.392433		0.5162
											0.389422		0.5162
											0.534954		0.5162
A-.	A-._1	-683.782	0.086738	-683.696	-429026	2.71335	0.0102275	0.00174328			0.397172		0.5162
	A-._2	-683.781	0.085846	-683.695	-429025	3.27874	0.00393606	0.000670903			0.413305		0.5162
	A-._3	-683.785	0.085069	-683.7	-429028	0.0109381	0.981696	0.16733			0.372148		0.5162
	A-._4	-683.785	0.086446	-683.698	-429027	1.04557	0.171032	0.0291525			0.463357		0.5162
	A-._5	-683.785	0.085521	-683.7	-429028	0.294646	0.607965	0.103628			0.448038		0.5162
	A-._6	-683.787	0.087073	-683.699	-429028	0.403576	0.5058	0.0862138			0.4322		0.5162
	A-._7	-683.787	0.086933	-683.7	-429028	0.309188	0.593215	0.101114			0.354257		0.5162
	A-._8	-683.787	0.086814	-683.7	-429028	0.238749	0.668158	0.113888			0.367916		0.5162
	A-._9	-683.785	0.084776	-683.7	-429028	-0.166525	1.32478	0.22581			0.531128		0.5162
	A-._10	-683.785	0.085039	-683.7	-429028	0	1	0.17045			0.67666		0.5162
											0.538879		0.5162
											0.555011		0.5162
											0.513854		0.5162
		SMD/CBS-QB3									0.605064		0.5162
		G (hartree)	G (kcal/mol)		redox potential		E0 (V)	E7 (V)			0.589744		0.5162
	A-.	-682.879	-428513		Eox2 (A-., DHA1)		0.286775				0.573906		0.5162
	DHA1	-682.71	-428407								0.495963		0.5162
		with inclusion of explicit water			redox potential		E0 (V)	E0(cor.) (V)			0.509622		0.5162
	A-.(H2O)2	-835.596	-524345		Eox2 (A-., DHA1)		0.327865				0.486262		0.5162
	DHA1(H2O)2	-835.426	-524238		Eox2 (A-., DHA2)		-0.0384032				0.631794		0.5162
	DHA2(H2O)	-835.439	-524246		Eox2 (A-., DHA4)		-0.368072				0.494012		0.5162
	DHA4(H2O)	-835.451	-524254		Eox2 (A-., DHA5)		-0.141644				0.510145		0.5162
	DHA5(H2O)2	-835.443	-524248								0.468988		0.5162
	1,2-Catechol (Q)				redox potential		E0				0.560197		0.5162
	Q-.	-420.292	-263737		Eox2 (Q-., Q)		-0.0555737				0.544878		0.5162
	Q	-420.135	-263639								0.52904		0.5162
											0.451097		0.5162
											0.464756		0.5162

## Sheet: DHA
	Relative enthalpy and free energy of DHAs
	Conversions	Hartree to kcal/mol	R	T	ln(10)*RT	Gaq(H+)	F	SHE+Ggas(e-)	SHE	Ggas(e-)
		627.51	0.00198588	298.15	1.36334	-270.297	23.0604	4.3186	4.281	-0.867
		SMD/B3LYP/6-31+G(d,p) with inplusion of explicit waters
	DHAs	H (hartree)	G (hartree)	DH (kcal/mol)	DG (kcal/mol)		DHA-s	G (hartree)	pKa		Reactions	DG (kcal/mol)		DG(cor.) (CBS-QB3) - DG (B3LYP)(kcal/mol)
	DHA1a(H2O)2	-836.323	-836.389	0	0
	DHA1b(H2O)2	-836.323	-836.388	-0.171938	0.416039
	DHA2(H2O)2	-836.337	-836.398	-9.27208	-5.74234		DHA2-(H2O)	-835.952	7.31668		DHA2 => DHA4	-2.96937		-2.5154
	DHA3(H2O)2	-836.329	-836.39	-3.50213	-0.973895		DHA3-(H2O)	-835.937	10.1575		DHA2- => DHA4-	-1.93649		-2.24494
	DHA4(H2O)2	-836.345	-836.403	-13.745	-8.71171		DHA4-(H2O)	-835.955	8.0743
	DHA5b(H2O)2	-836.335	-836.398	-7.7215	-5.57919
	DHA6	-836.334	-836.39	-7.37637	-0.409136		DHA6-	-835.941	8.48026
	SMD/CBS-QB3 with inclusion of explicit water
	DHAs	H (hartree)	G (hartree)	DH (kcal/mol)	DG (kcal/mol)	DG(cor.) (kcal/mol)	E0(cor.) (V)		DHA-s	G (hartree)	pKa		Hydration	DG (kcal/mol)	DG(cor.) (kcal/mol)
	DHA1a(H2O)2	-835.355	-835.426	0	0
	DHA1b(H2O)2	-835.361	-835.425	-3.57492	0.429844
	DHA2(H2O)2	-835.378	-835.439	-14.5061	-8.44628	-6.32878	0.0535562		DHA2-(H2O)	-834.991	7.90445		DHA2 => DHA4	-7.60228	-5.48478
	DHA3(H2O)2	-835.369	-835.429	-4.97741	-2.77798	-0.660483	0.299359		DHA3-(H2O)	-834.98	8.56633		DHA2- => DHA4-	-6.29894	-4.18144
	DHA4(H2O)2	-835.394	-835.451	-24.2131	-16.0486	-11.8136	-0.184288		DHA4-(H2O)	-835.001	8.86044
	DHA5b(H2O)2	-835.379	-835.443	-15.1977	-10.827	-8.70955	-0.0496846
	DHA6	-835.387	-835.442	-19.8092	-10.5102	-6.27515	0.0558815		DHA6-	-834.991	9.71702
	SMD/CBS-QB3 with inclusion of explicit water
			G (hartree)	DG (kcal/mol)	DG(cor.) (kcal/mol)
	ketone		-345.567
	Gemdiol		-345.565	1.5625	-2.1175
	DG(cor.) (kcal/mol) is DG corrected with the expermental value of 3.68 kcal/mol

## Sheet: Disproportionation
	Disprportionation of ascorbic acid radicals
		Conversion	Hartree to kcal/mol	R	T	ln(10)*RT	Gaq(H+)	F
			627.51	0.00198588	298.15	1.36334	-270.297	23.0604
		SMD/B3LYP/6-31+G(d,p)											Energy diagram estimated at CBS-QB3
	Label	Shortname		SCF (hartree)	G (hartree)		Reactions		DG (kcal/mol)	DG(cor.) (kcal/mol)					DG (kcal/mol)		DG (kcal/mol)		DG (kcal/mol)		DG (kcal/mol)
		A-.(H2O)2			-836.57		A-.(H2O)2 + A-.		-953984				1	A-.(H2O)2 + A-.	0	A(-.) + A(-.)	0	A-.(H2O)2 + A-.	0	A-.(H2O)2 + A-.	0
		A-.(H2O)			-760.136								2		0		0		0		0
		A(-.)			-683.7								3	A(2-) + DHA1	7.75225	1	-1.28432	1	-1.28432	1	-1.28432
	1	A--A		-1520.48	-1520.24		A(-.) + A(-.) => A--A		17.5797				4		7.75225		-1.28432		-1.28432		-1.28432
	3a	HA--Aa		-1520.94	-1520.69		A--Aa => cycA--A		-0.840863	-3.08586			5			DHA1 + HA-	2.97375	2	-4.37018	3a	-3.36077
	3b	HA--Ab		-1520.93	-1520.68		HA--Aa => cycHA--Aa		-2.72527				6				2.97375		-4.37018		-3.36077
	TS(3b/4b)	ts(HA--Ab/cycHA--Ab)		-1520.92	-1520.67		HA--Ab => cycHA--Ab		-5.7825	-8.2975			7			DHA5 + HA-	-5.7358	DHA5 + HA-	-5.7358	3b	1.79297
	4b	cycHA--Ab		-1520.95	-1520.69								8				-5.7358		-5.7358		1.79297
	4a	cycHA--Aa		-1520.95	-1520.7		pKa(HA_Aa/A_A)		8.52306				9							TS(3b/4b)	12.2893
	2	cycA--A		-1520.49	-1520.24		pKa(cycHA_A/cycA_A)		9.90527				10								12.2893
													11							4b	-6.50453
													12								-6.50453
		SMD/CBS-QB3											13							4a	-8.60104
		shortname			G (hartree)								14								-8.60104
		HA-(H2O)2			-836.208								15							DHA5 + HA-	-5.7358
		HA-			-683.49								16								-5.7358
		A2-(H2O)2 (a=0.9)			-835.755
		A-.(H2O)2			-835.596
		A-.			-682.879
		DHA1a(H2O)2			-835.426
		DHA5b(H2O)2			-835.443
		TS(DHA5b/DHA4)			-835.415
		DHA4(H2O)2			-835.451
		DHA1c(H2O)2			-835.428
		TS(DHA1c/5a)			-835.41
		DHA5a(H2O)2			-835.441
	Lactone_dimerization
	SMD/B3LYP/6-31+G(d,p)
		Shortname			G (hartree)		Reactions		DG (kcal/mol)	DG(cor.) (CBS-QB3) - DG (B3LYP)(kcal/mol)
		L-.(H2O)		-531.148	-531.103
		L--L2-.(H2O)2		-1062.29	-1062.17		2 L-.(H2O)2 => A--A2-		19.7766	-18.8642
		SMD/CBS-QB3			G (hartree)
		L-.(H2O)			-530.472		2 L-.(H2O)2 => A--A2-		0.912399
		L--L2-.(H2O)2			-1060.94

## Sheet: Asc_O2
	Reaction of ascorbic acid radical with superoxide
		Conversion	Hartree to kcal/mol	R	T	ln(10)*RT	Gaq(H+)
			627.51	0.00198588	298.15	1.36334	-270.297
		SMD/CBS-QB3										Energy diagram estimated at CBS-QB3
	Label	Shortname		G (hartree)		Reactions		G (kcal/mol)	DG (kcal/mol)						DG (kcal/mol)				DG (kcal/mol)
		A(-.)_2wat		-835.596		A(-.) + O2(-.)		-618678	0			1	A(-.) + O2(-.)		0		A(-.) + O2(-.)		0
		O2(-.)		-150.329		A(-.) + O2(-.) => A--OO (a=1)			-5.39595			2			0				0
		H2O2		-151.415								3	5		-5.39595		5		-5.39595
	9a	HA--OOHa		-986.849		9a => TS(9a/DHA1_H2O2)			18.0967			4			-5.39595				-5.39595
		TS(9a/DHA1 + H2O2)		-986.82		9b => TS(9b/10b)			7.66628			5	7		-28.2683		7		-28.2683
		DHA1_H2O2		-986.831		10a => TS(DHA1c/DHA5a)			19.1271			6			-28.2683				-28.2683
	5	A--OOa(a=1)		-985.934								7	9a		-38.601		9a		-38.601
	7	A--OOHa		-986.401								8			-38.601				-38.601
	9b	HA--OOHb		-986.847		Cyclization			DG (kcal/mol)			9	TS(9a/DHA1 + H2O2)		-20.5043		9b		-37.3956
		TS(9b/10b)		-986.835		9a => 10a						10			-20.5043				-37.3956
	10b	cycHA--OOHb		-986.866		11 => 12						11	DHA1a + H2O2		-33.7623		TS(9b/10b)		-29.7293
	10a	cycHA--OOHa		-986.859		7 => 8						12			-33.7623				-29.7293
		TS(10a/DHA5 + H2O2)		-986.829		5 => 6						13	DHA1c + H2O2		-35.2878		10b		-49.1564
		DHA5b(H2O)2		-835.443								14			-35.2878				-49.1564
		DHA1a(H2O)2		-835.426								15	TS(DHA1c/DHA5a)		-24.2348		10a		-45.1566
		DHA1c(H2O)2		-835.428								16			-24.2348				-45.1566
		TS(DHA1c/DHA5a)		-835.41		pKa's			pKa			17	DHA5 + H2O2		-42.4719		TS(10a/DHA5 + H2O2)		-26.0295
	9a	HA--OOHa		-986.849		pKa(HA-OOHa/HA-OOa)			11.6327			18			-42.4719				-26.0295
	11	HA--OOa		-986.393		pKa(HA-OOHa/A-OOHa)			7.57904			19					DHA5 + H2O2		-42.4719
	7	A--OOHa		-986.401		pKa(A-OOH/A-OO)			16.7767			20							-42.4719
	5	A--Ooa		-985.934		pKa(HA-OO/A-OO)			12.7231
	10a	cycHA--OOHa		-986.859		pKa(cycHA-OOH/cycHA-OO)			11.3395
	12	cycHA--OOa		-986.404		pKa(cycHA-OOH/cycA-OOH)			7.94128
	8	cycA--OOHa		-986.411		pKa(cycA-OOH/cycA-OO)			13.7288
	6	cycA--OOa		-985.951		pKa(cycHA-OO/cycA-OO)			10.3306
